# Supplementary material for: The Breast Implant Size Selection System for Direct To Implant Breast Reconstruction. A Retrospective and Prospective analysis
Source: Research Square preprint supplement (doi:10.21203/rs.3.rs-7463254/v1), 2025-09-09
Supplement: Supplementary file 1 [file 239160c8ed546d64fcd7aa39.docx]

| **Characteristic** | **Value (N) ( Unit)** |
| --- | --- |
| **Indication**  BRCA  Ductal carcinoma in situ  Invasive ductal carcinoma  Lobular carcinoma in situ  Invasive lobular carcinoma  **Pre-operative breast size estimation**  A cup  B cup  C cup  **Pre-operative breast measurement**  Anterior skin envelope circumference including nipple, Cm  Left  Mean  Range  Right  Mean  Range  **Anterior skin envelope without nipple areolar complex, Cm**  Left  Mean  Range  Right  Mean  Range  **Sternal notch to nipple length, Cm**  Left  Mean  Range  Right  Mean  Range  **Nipple to inframammary fold length, Cm**  Left  Mean  Range  Right  Mean  Range  **Neo-adjuvant treatment**  Chemotherapy  Radiation therapy  Hormonal therapy  **Adjuvant treatment**  Radiation | 14 70%  7 35%  1 5%  - -  1 5%  14 70%  4 20%  2 10%      15.9±1.5 cm  11.5-17cm    15.8±1.6 cm  11.5-17 cm  13.1±2.05 cm  11.5-16 cm  12.96±1.98 cm  9.5-16 cm  21.6±1.7 cm  19-25 cm  21.15±1.8 cm  18 -25 cm    8.57±2.9 cm  6-16 cm  8.53±2.7 cm  6-16 cm  3 15%  1 5%  1 5%    3 15% |
| **Excision weight, gr.**  Right  Mean  Range  Left  Mean  Range  **Implant volume, cc**  Right  Mean  Range  Left  Mean  Range  **Operative plane**  Pre-pectoral  Sub-pectoral  **Implant selection**  Motiva Ergonomix  Full  Demi  Mini  **Accuracy rate** | 212 gr  75 - 400 gr  218gr  72 - 488 gr    306 cc  215 – 380 cc    297 cc  215 – 380 cc    36 breast 90%  2 breast 10%      4 10.5%  31 81.5%  3 8%  90 % |

Table 2. Retrospective cohort operative characteristics
