# Supplementary material for: The Breast Implant Size Selection System for Direct To Implant Breast Reconstruction. A Retrospective and Prospective analysis
Source: Research Square preprint supplement (doi:10.21203/rs.3.rs-7463254/v1), 2025-09-09
Supplement: Supplementary file 2 [file 4f226eaf900b9f3f76da4cc6.docx]

| **Characteristic** | **Retrospective cohort**  **Value (N) (%)** | **Prospective cohort**  **Value (N) (%)** |
| --- | --- | --- |
| **Patients**  Total  Unilateral  Bilateral  **Breasts**  **Age, yr.**  Mean  Range  **BMI, kg/m2**  Mean  Range  **Patient characteristics**  Smoking  Hypertension  Hypothyroidism  Status post Oophorectomy  Status post lumpectomy | 20 100  2 10  18 90  38 100  40.6±7.8  28-54  21.2±1.98  16.7-27.3    3 15  1 5  - -  2 10  10 2 | 22 100  3 14  19 86  41 100  38.0±9.7  21-63  21.4±3.11  16.8-29.4  4 19  2 9.5  1 4.75  3 14  2 9.5 |

Table 1. Patients’ characteristics, retrospective and prospective cohort.
