# Supplementary material for: The Breast Implant Size Selection System for Direct To Implant Breast Reconstruction. A Retrospective and Prospective analysis
Source: Research Square preprint supplement (doi:10.21203/rs.3.rs-7463254/v1), 2025-09-09
Supplement: Supplementary file 3 [file b49baa8e768f29190d857ffe.docx]

| Complications | Retrospective cohort  Value (N) (%) | Prospective cohort  Value (N) (%) |
| --- | --- | --- |
| Patients | 20 100 | 22 100 |
| Breast | 38 100 | 41 100 |
| Total complication occurrence | 7 18.4 | 8 19.5 |
| Minor (Clavien–Dindo grades 1-2) | 6 15.7 | 8 19.5 |
| Major (Clavien–Dindo grades 3-4) | 1 2.63 | - |
| Rippling | 3 7.89 | 2 4.8 |
| Hematoma | 2 5.26 | - |
| Seroma | - | 2 5.12 |
| Capsular contraction irradiated breast |  |  |
| Backer grade 3-4 | 1 2.63 | - |
| Capsular contraction non-irradiated breast |  |  |
| Backer grade 3-4 | - | 1 2.43 |
| Skin ischemia | 1 2.7 | 1 2.43 |
| Wound healing problem | - | 1 2.43 |
| Infection | 1 2.7 | 1 2.43 |
| Red breast syndrome | - | - |

Table 4. Complication profile, retrospective and prospective cohort comparison. Data is exhibited per breast.
