# Supplementary material for: The Breast Implant Size Selection System for Direct To Implant Breast Reconstruction. A Retrospective and Prospective analysis
Source: Research Square preprint supplement (doi:10.21203/rs.3.rs-7463254/v1), 2025-09-09
Supplement: Supplementary file 4 [file d57e4630dc01014e5b291b96.docx]

| **Characteristic** | **Value (N) (Unit)** |
| --- | --- |
| **Indication**  BRCA  Ductal carcinoma in situ  Invasive ductal carcinoma  lobular carcinoma in situ  Invasive lobular carcinoma  **Pre-operative breast size estimation**  A cup  B cup  C cup  **Pre-operative breast measurement**  **Anterior skin envelope circumference including nipple, Cm**  Left  Mean  Range  Right  Mean  Range  **Anterior skin envelope without nipple areolar complex, Cm**  Left  Mean  Range  Right  Mean  Range  **Sternal notch to nipple length, Cm**  Left  Mean  Range  Right  Mean  Range  **Nipple to inframammary fold length, Cm**  Left  Mean  Range  Right  Mean  Range  **Neo-adjuvant treatment**  Chemotherapy  Radiation therapy  Hormonal therapy  **Adjuvant treatment**  Radiation | 16 72.7%  3 13.6%  4 18.1%  1 4.54%  1 4.54%  16 72.7%  4 18.1%  2 9%        16.2±2.3 cm  13-20 cm    16.2±2.3 cm  13-20 cm    14.5±1.64 cm  12-16 cm  14.75±1.67 cm  12-16.5 cm  21.4±3 cm  17.5-27 cm  21.35±2.5 cm  17.5 -25 cm    8±1.5 cm  5-11.5 cm  8±1.4 cm  6-11.5 cm    3 13.6%  0 0  1 4.54%    1 4.54% |
| **Excision weight, gr.**  Right  Mean  Range  Left  Mean  Range  **Implant volume, cc**  Right  Mean  Range  Left  Mean  Range  **Operative plane**  Pre-pectoral  Sub-pectoral  **Implant selection**  Motiva Ergonomix  Full  Demi  Mini  **Accuracy rate** | 230 gr  95 - 420 gr  256 gr  100 - 500 gr    312 cc  55 – 420 cc    315 cc  205 – 500 cc    41 breast 100%  0 breast 0      11 26.8%  28 68.2%  2 4.87%  91% |

Table 3. Prospective cohort operative characteristics.
